# Supplementary material for: Computational evaluation of optoelectronic and photophysical properties of unsymmetrical distyrylbiphenyls
Source: Royal Society of Chemistry journal article supplement (doi:10.1039/c4ra07809h), 2014-10-03
Supplement: c4ra07809h1.pdf [file c4ra07809h1.pdf]

## *Supporting Information*

### **Computational Evaluation of Optoelectronic and Photophysical Properties of Unsymmetrical Distyrylbiphenyls**

Gunasekaran Velmurugan, Swaminathan Angeline Vedha and Ponnambalam Venuvanalingam\*

Theoretical and Computational Chemistry Laboratory  
School of Chemistry  
Bharathidasan University  
Tiruchirappalli- 620 024

\* Author for correspondence

E-Mail: [venuvanalingam@yahoo.com](mailto:venuvanalingam@yahoo.com), Ph: ++91-431-2407053, Fax: ++91-431-2407045

SIF1. Optimized structures of UDB 1-14 at B3LYP/6-311G(d,p) level.

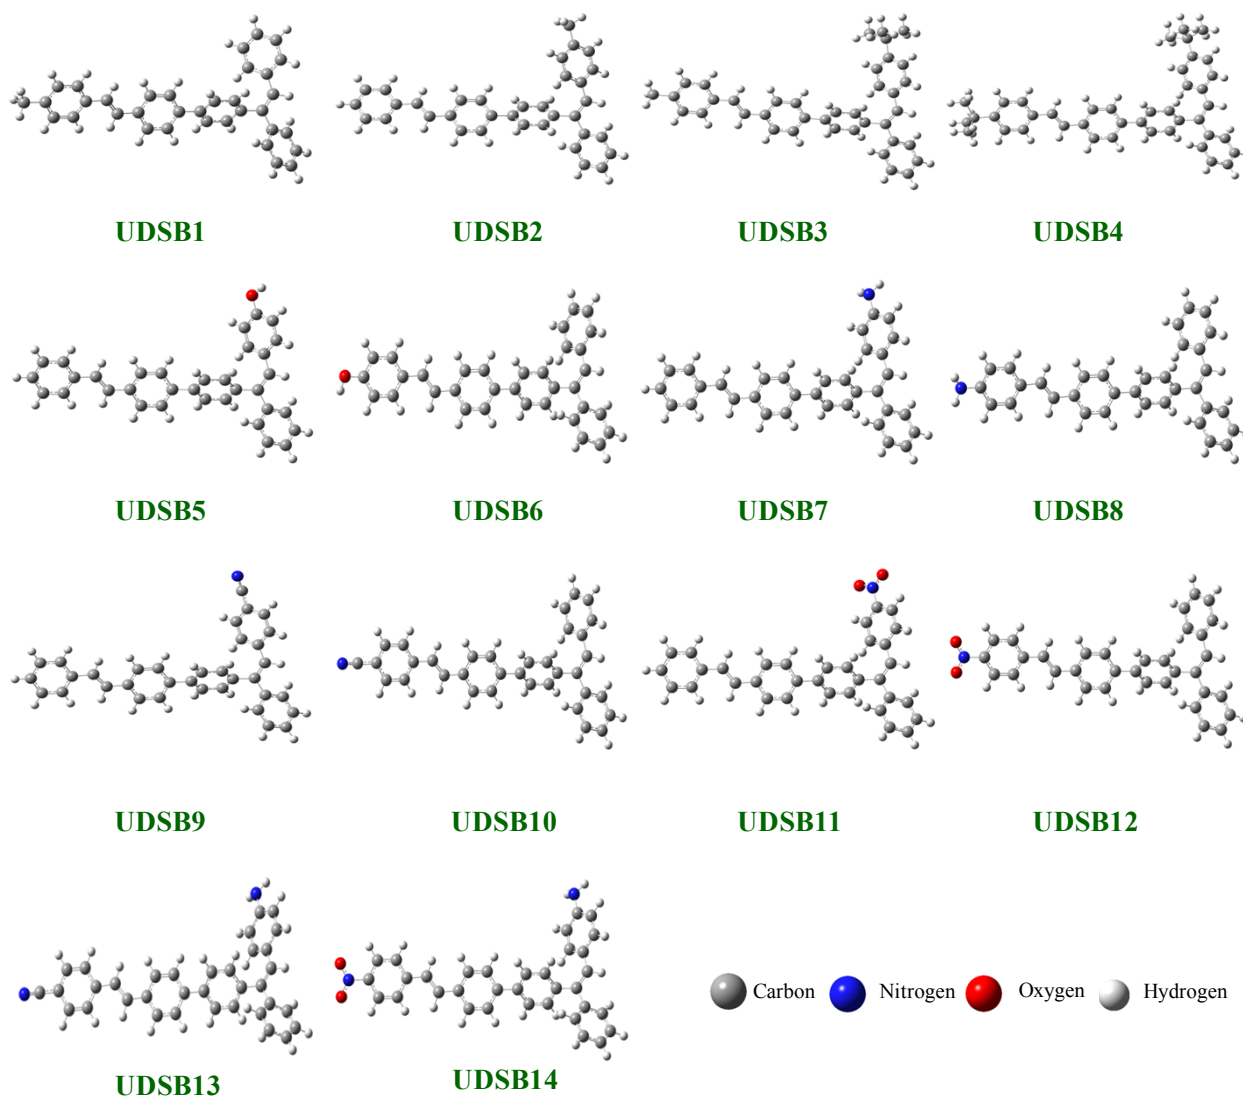

SIF2. Illustration of  $\pi$ -delocalization from calculated C-C bond lengths of UDSB 1-14 at B3LYP/6-311G(d,p) level.

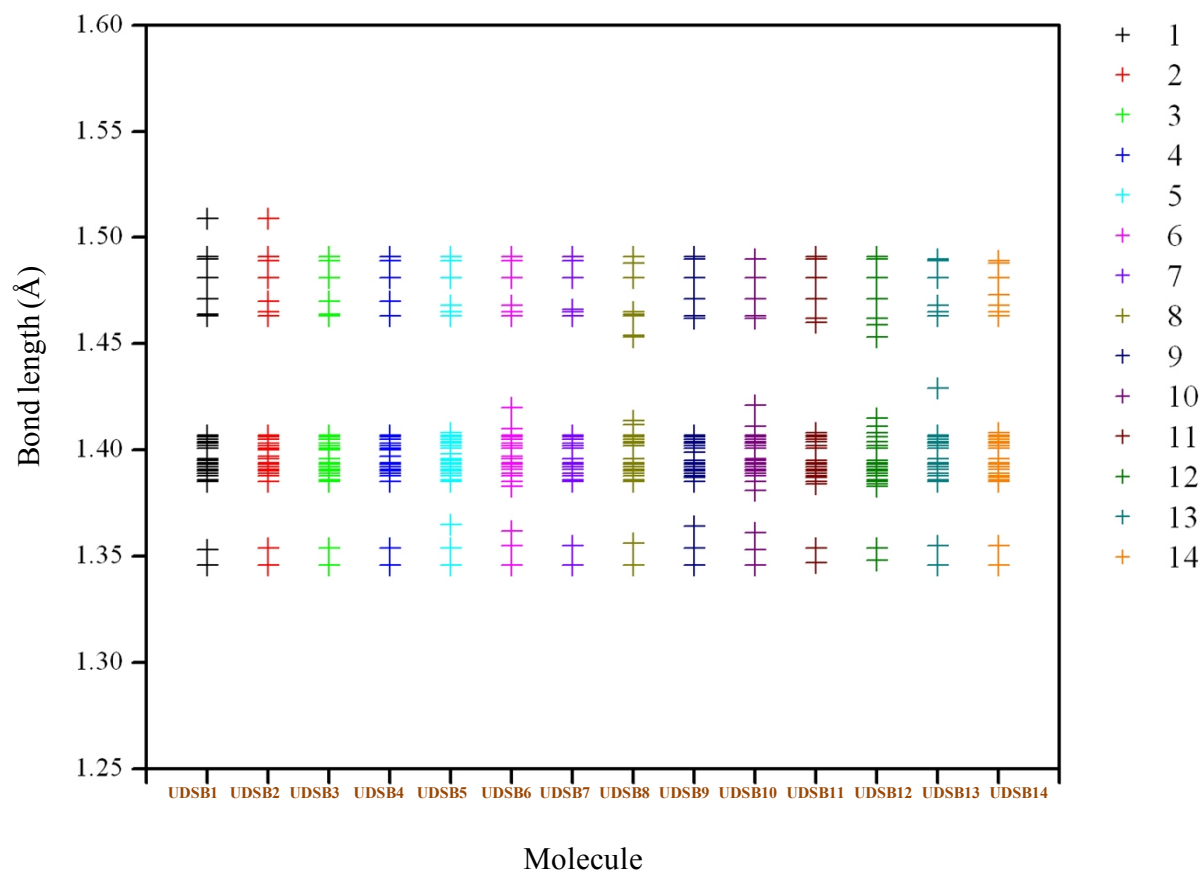

SIF3. Effect of solvent on computed absorption spectra of UDSB 1-4

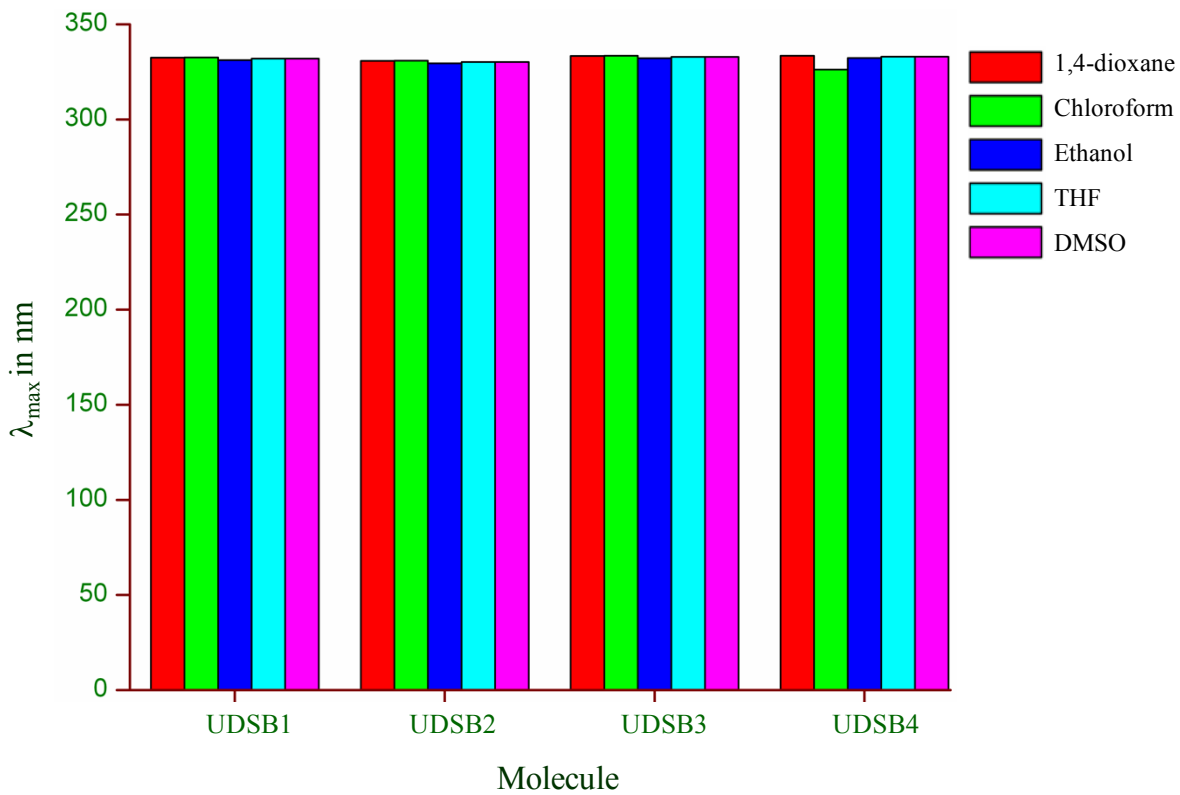

#### SIF4. Effect of Solvent on Computed Absorption Spectra of UDSB 5-14

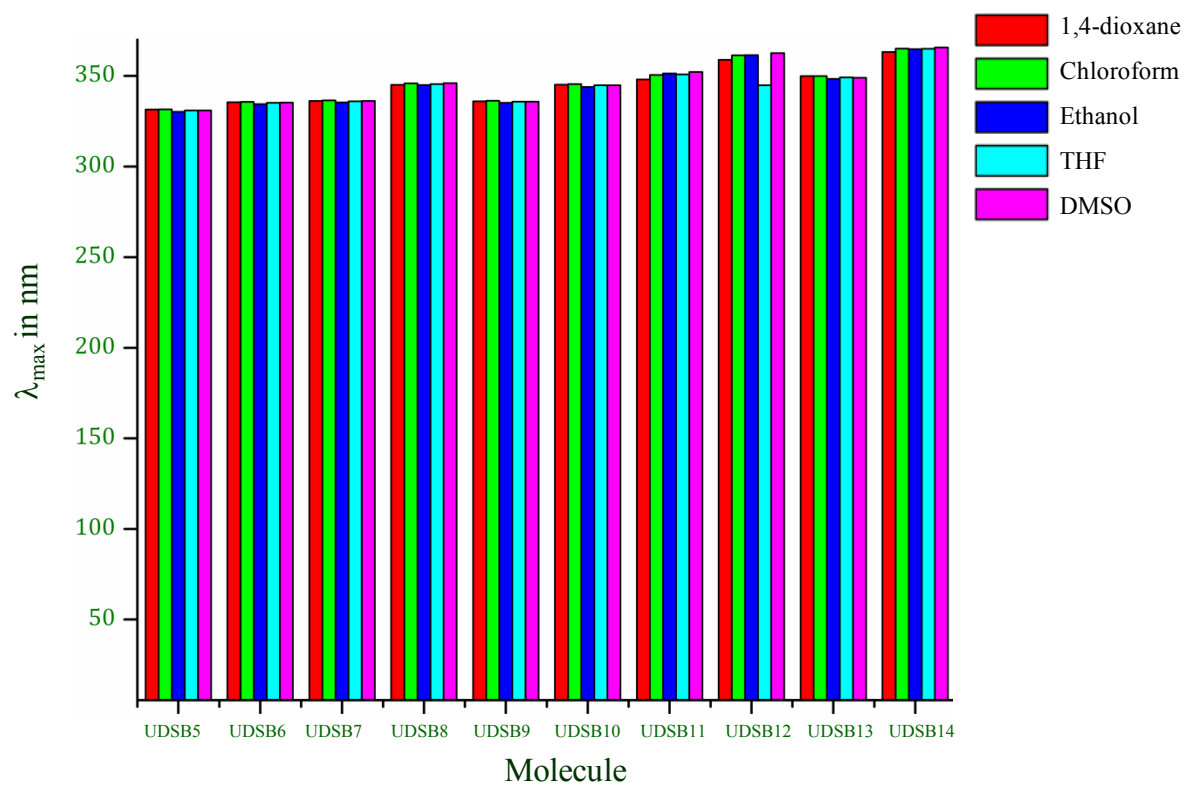

SIF5. Effect of Solvent on Computed Emission Spectra of UDSB 1-4

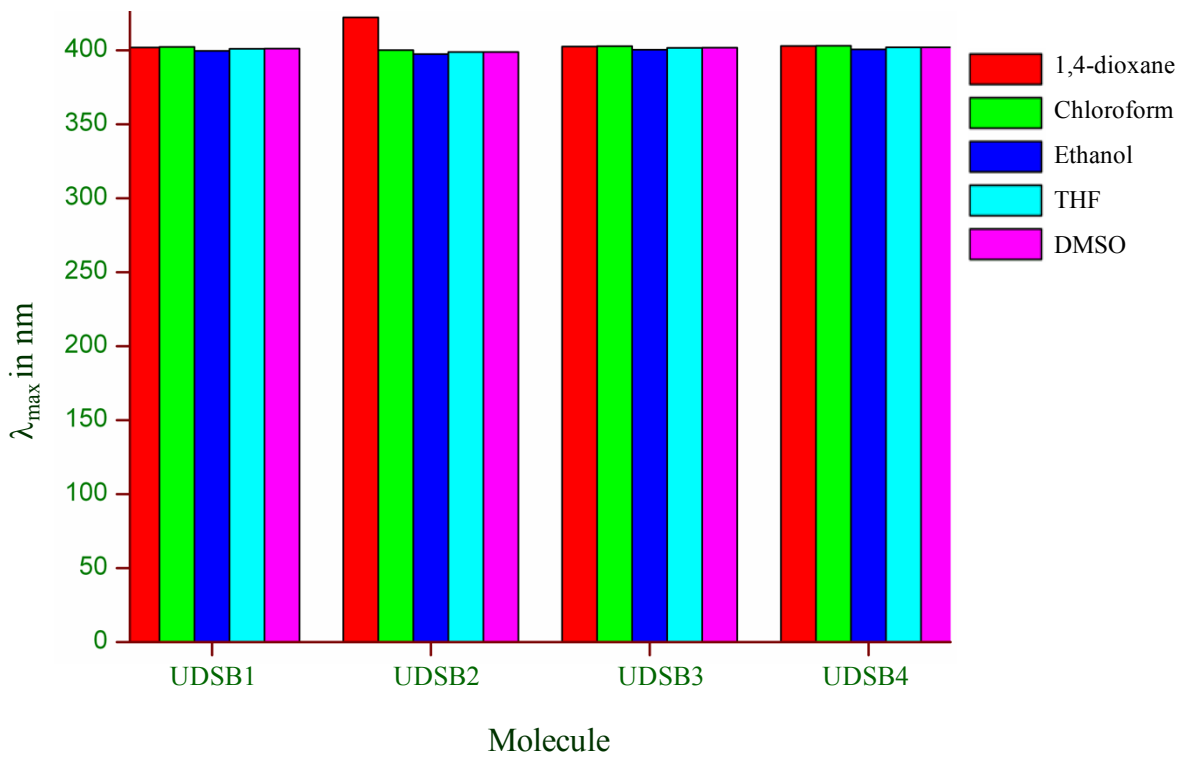

SIF6. Effect of Solvent on Computed Emission Spectra of UDSB 5-14

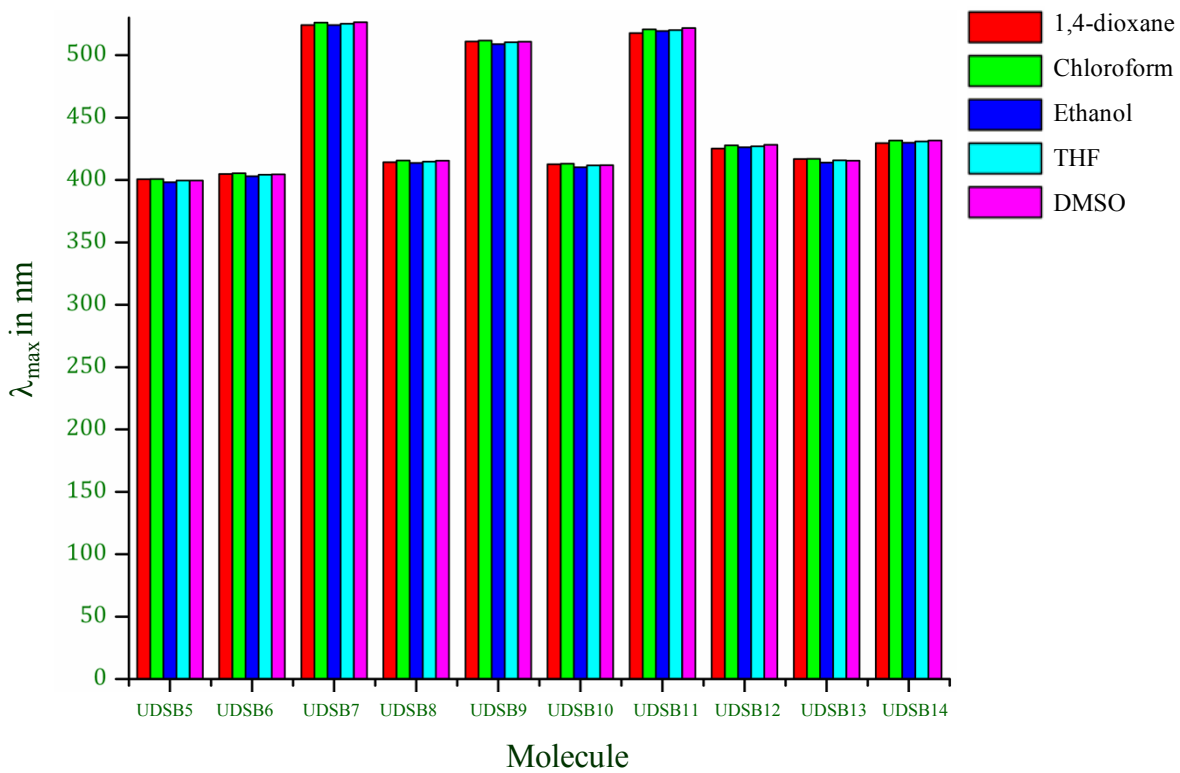

SIF7. Natural Transition Orbitals (NTOs) for the UDSB 1-7 illustrating the nature of optically active singlet excited states in the absorption bands. Shown are only occupied (holes) and unoccupied (electrons) NTO pairs that contribute more than 50% to each excited state. All transitions have  $\pi \rightarrow \pi^*$  character.

| Molecule | $\lambda_{\text{cal}}$ (nm) |                  | Hole                                                                                | Electron                                                                              |
|----------|-----------------------------|------------------|-------------------------------------------------------------------------------------|---------------------------------------------------------------------------------------|
| UDSB1    | 333                         | $S_1$<br>W= 0.88 | 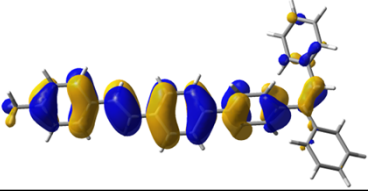   |    |
| UDSB2    | 331                         | $S_1$<br>W= 0.85 |    |    |
| UDSB3    | 334                         | $S_1$<br>W= 0.87 |   |   |
| UDSB4    | 334                         | $S_1$<br>W= 0.87 |  |  |
| UDSB5    | 332                         | $S_1$<br>W= 0.84 |  |  |
| UDSB6    | 336                         | $S_1$<br>W= 0.83 |  |  |
| UDSB7    | 337                         | $S_1$<br>W= 0.79 |  |  |



SIF8. Natural Transition Orbitals (NTOs) for the UDSB 8-14 illustrating the nature of optically active singlet excited states in the absorption bands. Shown are only occupied (holes) and unoccupied (electrons) NTO pairs that contribute more than 50% to each excited state. All transitions have  $\pi \rightarrow \pi^*$  character.

| Molecule | $\lambda_{\text{cal}}$ (nm) |                  | Hole                                                                                | Electron                                                                              |
|----------|-----------------------------|------------------|-------------------------------------------------------------------------------------|---------------------------------------------------------------------------------------|
| UDSB8    | 346                         | $S_1$<br>W= 0.83 | 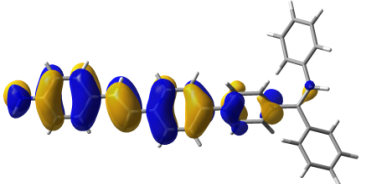   |    |
| UDSB9    | 336                         | $S_1$<br>W= 0.90 |    |    |
| UDSB10   | 346                         | $S_1$<br>W= 0.91 |    |    |
| UDSB11   | 351                         | $S_1$<br>W= 0.84 |   |   |
| UDSB12   | 361                         | $S_1$<br>W= 0.92 |  |  |
| UDSB13   | 350                         | $S_1$<br>W= 0.86 |  |  |
| UDSB14   | 365                         | $S_1$<br>W= 0.89 |  |  |

SIF9. Natural Transition Orbitals (NTOs) for the UDSB 1-7 illustrating the nature of optically active singlet excited states in the emission bands. Shown are only occupied (holes) and unoccupied (electrons) NTO pairs that contribute more than 50% to each excited state. All transitions have  $\pi \rightarrow \pi^*$  character.

| Molecule | $\lambda_{\text{cal}}$ (nm) |                  | Hole                                                                                | Electron                                                                              |
|----------|-----------------------------|------------------|-------------------------------------------------------------------------------------|---------------------------------------------------------------------------------------|
| UDSB1    | 402                         | $S_1$<br>W= 0.95 | 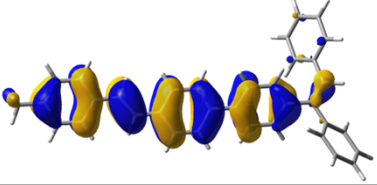   |    |
| UDSB2    | 400                         | $S_1$<br>W= 0.94 |    |    |
| UDSB3    | 403                         | $S_1$<br>W= 0.94 |    |    |
| UDSB4    | 403                         | $S_1$<br>W= 0.94 |   |   |
| UDSB5    | 401                         | $S_1$<br>W= 0.94 |  |  |
| UDSB6    | 405                         | $S_1$<br>W= 0.93 |  |  |
| UDSB7    | 526                         | $S_1$<br>W= 0.99 |  |  |

SIF10. Natural Transition Orbitals (NTOs) for the UDSB 8-14 illustrating the nature of optically active singlet excited states in the emission bands. Shown are only occupied (holes) and unoccupied (electrons) NTO pairs that contribute more than 50% to each excited state. All transitions have  $\pi \rightarrow \pi^*$  character.

| Molecule | $\lambda_{\text{cal}}$ (nm) |                  | Hole | Electron |
|----------|-----------------------------|------------------|------|----------|
| UDSB8    | 416                         | $S_1$<br>W= 0.99 |      |          |
| UDSB9    | 512                         | $S_1$<br>W= 0.95 |      |          |
| UDSB10   | 413                         | $S_1$<br>W= 0.95 |      |          |
| UDSB11   | 521                         | $S_1$<br>W= 0.99 |      |          |
| UDSB12   | 428                         | $S_1$<br>W= 0.95 |      |          |
| UDSB13   | 417                         | $S_1$<br>W= 0.94 |      |          |
| UDSB14   | 432                         | $S_1$<br>W= 0.95 |      |          |

SIT1. Selected bond lengths (Å) and dihedral angles (°) of UDSB2 and UDSB7 B3LYP/6-311G(d,p) calculations

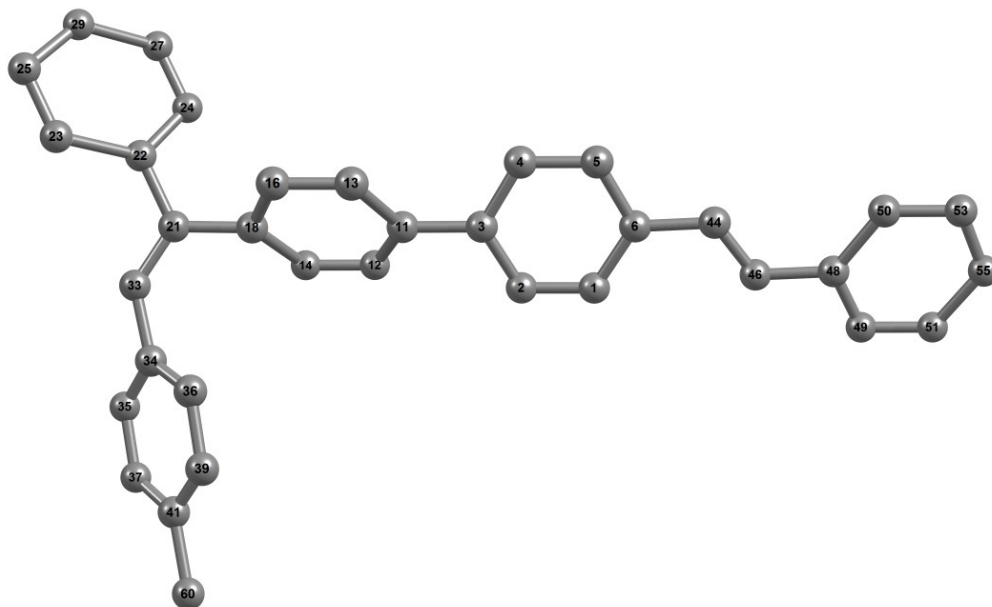

|         | UDSB2   |          |         | UDSB7   |          |         |
|---------|---------|----------|---------|---------|----------|---------|
|         | Neutral | Cationic | Anionic | Neutral | Cationic | Anionic |
| C1-C2   | 1.385   | 1.376    | 1.378   | 1.382   | 1.379    | 1.377   |
| C2-C3   | 1.406   | 1.416    | 1.420   | 1.406   | 1.412    | 1.421   |
| C3-C4   | 1.402   | 1.413    | 1.419   | 1.402   | 1.409    | 1.420   |
| C4-C5   | 1.388   | 1.379    | 1.379   | 1.388   | 1.381    | 1.378   |
| C5-C6   | 1.505   | 1.415    | 1.418   | 1.405   | 1.411    | 1.420   |
| C6-C1   | 1.407   | 1.416    | 1.421   | 1.407   | 1.413    | 1.423   |
| C3-C11  | 1.481   | 1.461    | 1.456   | 1.481   | 1.466    | 1.455   |
| C11-C12 | 1.403   | 1.415    | 1.419   | 1.403   | 1.413    | 1.420   |
| C12-C14 | 1.389   | 1.379    | 1.380   | 1.390   | 1.380    | 1.380   |
| C14-C18 | 1.401   | 1.414    | 1.416   | 1.401   | 1.413    | 1.415   |
| C18-C16 | 1.402   | 1.413    | 1.416   | 1.401   | 1.412    | 1.415   |
| C16-C13 | 1.389   | 1.380    | 1.381   | 1.390   | 1.381    | 1.382   |
| C13-C11 | 1.403   | 1.414    | 1.419   | 1.403   | 1.412    | 1.419   |
| C18-C21 | 1.491   | 1.466    | 1.464   | 1.491   | 1.465    | 1.467   |
| C21-C22 | 1.489   | 1.480    | 1.487   | 1.489   | 1.476    | 1.487   |
| C22-C23 | 1.404   | 1.408    | 1.408   | 1.405   | 1.408    | 1.408   |
| C23-C25 | 1.391   | 1.390    | 1.392   | 1.396   | 1.388    | 1.392   |
| C25-C29 | 1.393   | 1.400    | 1.394   | 1.393   | 1.395    | 1.394   |

|                 |       |        |        |        |       |       |
|-----------------|-------|--------|--------|--------|-------|-------|
| C29-C27         | 1.394 | 1.394  | 1.340  | 1.394  | 1.394 | 1.396 |
| C27-C24         | 1.391 | 1.390  | 1.390  | 1.391  | 1.389 | 1.390 |
| C24-C22         | 1.404 | 1.410  | 1.409  | 1.405  | 1.409 | 1.408 |
| C21-C33         | 1.354 | 1.381  | 1.383  | 1.355  | 1.388 | 1.379 |
| C33-C34         | 1.470 | 1.444  | 1.452  | 1.466  | 1.430 | 1.456 |
| C34-C35         | 1.405 | 1.415  | 1.414  | 1.406  | 1.424 | 1.412 |
| C35-C37         | 1.390 | 1.382  | 1.390  | 1.386  | 1.372 | 1.388 |
| C37-C41         | 1.397 | 1.405  | 1.400  | 1.403  | 1.418 | 1.401 |
| C41-C(N)60      | 1.509 | 1.503  | 1.510  | 1.392  | 1.351 | 1.410 |
| C34-C36         | 1.405 | 1.415  | 1.416  | 1.407  | 1.424 | 1.414 |
| C36-39          | 1.389 | 1.383  | 1.387  | 1.385  | 1.371 | 1.386 |
| C39-C41         | 1.400 | 1.405  | 1.402  | 1.405  | 1.420 | 1.402 |
| C6-C44          | 1.463 | 1.442  | 1.437  | 1.463  | 1.450 | 1.434 |
| C44-C46         | 1.346 | 1.361  | 1.368  | 1.346  | 1.355 | 1.371 |
| C46-C48         | 1.465 | 1.448  | 1.447  | 1.465  | 1.454 | 1.444 |
| C48-C49         | 1.405 | 1.411  | 1.416  | 1.405  | 1.408 | 1.417 |
| C49-C51         | 1.391 | 1.387  | 1.388  | 1.391  | 1.389 | 1.387 |
| C51-C55         | 1.392 | 1.395  | 1.397  | 1.392  | 1.394 | 1.398 |
| C55-C53         | 1.396 | 1.399  | 1.340  | 1.340  | 1.398 | 1.399 |
| C53-C50         | 1.388 | 1.384  | 1.387  | 1.388  | 1.386 | 1.387 |
| C50-C48         | 1.407 | 1.412  | 1.418  | 1.407  | 1.410 | 1.419 |
| C1-C6-C44-C46   | 3.94  | 0.54   | 0.52   | 3.57   | 0.34  | 0.43  |
| C44-C46-C48-C50 | 3.58  | 0.14   | 0.22   | 3.08   | 0.59  | 0.02  |
| C2-C3-C11-C12   | 37.56 | 24.617 | 19.685 | 37.32  | 26.72 | 18.96 |
| C4-C3-C11-C13   | 37.00 | 24.31  | 18.94  | 36.789 | 26.29 | 18.20 |
| C16-C18-C21-C22 | 54.85 | 40.09  | 39.314 | 55.616 | 40.55 | 40.68 |
| C14-C18-C21-C33 | 54.46 | 18.64  | 36.451 | 55.319 | 40.94 | 38.03 |
| C18-C21-C33-C34 | 8.30  | 15.89  | 18.218 | 8.675  | 18.56 | 16.82 |

SIT2. Second order perturbation interactions obtained for UDSB 1-14 at B3LYP/6-311g(d,p) from NBO calculations

| Molecules | Donor(i)        | Acceptor(j)       | E(2) (kcal mol <sup>-1</sup> ) | E(j)-E(i) (a.u) | F(i,j) (a.u) |
|-----------|-----------------|-------------------|--------------------------------|-----------------|--------------|
| UDSB1     | $\pi$ C11 – C12 | $\pi^*$ C14 – C18 | 21.95                          | 0.28            | 0.070        |
|           | $\pi$ C30 – C34 | $\pi^*$ C27 – C28 | 21.55                          | 0.28            | 0.070        |
| UDSB2     | $\pi$ C37 – C41 | $\pi^*$ C34 – C35 | 21.98                          | 0.28            | 0.071        |
|           | $\pi$ C11 – C12 | $\pi^*$ C14 – C18 | 21.83                          | 0.28            | 0.070        |
| UDSB3     | $\pi$ C47 – C49 | $\pi^*$ C42 – C44 | 21.96                          | 0.28            | 0.071        |
|           | $\pi$ C11 – C12 | $\pi^*$ C14 – C18 | 21.90                          | 0.28            | 0.070        |
| UDSB4     | $\pi$ C43 – C45 | $\pi^*$ C38 – C40 | 21.96                          | 0.28            | 0.071        |
|           | $\pi$ C11 – C12 | $\pi^*$ C14 – C18 | 21.89                          | 0.28            | 0.070        |
| UDSB5     | LP (2) O59      | $\pi^*$ C41 – C45 | 28.80                          | 0.35            | 0.096        |
|           | $\pi$ C40 – C43 | $\pi^*$ C41 – C45 | 22.97                          | 0.27            | 0.073        |
| UDSB6     | LP (2) O60      | $\pi^*$ C30 – C34 | 27.63                          | 0.35            | 0.094        |
|           | $\pi$ C30 – C34 | $\pi^*$ C27 – C28 | 23.37                          | 0.29            | 0.074        |
| UDSB7     | LP (1) N 60     | $\pi^*$ C41 – C45 | 27.83                          | 0.33            | 0.091        |
|           | $\pi$ C41 – C45 | $\pi^*$ C38 – C39 | 24.66                          | 0.29            | 0.076        |
| UDSB8     | LP (1) N 60     | $\pi^*$ C30 – C34 | 28.11                          | 0.33            | 0.091        |
|           | $\pi$ C30 – C34 | $\pi^*$ C27 – C28 | 24.30                          | 0.29            | 0.076        |
| UDSB9     | $\pi$ C38 – C39 | $\pi^*$ C41 – C45 | 24.46                          | 0.27            | 0.073        |
|           | $\pi$ C11 – C12 | $\pi^*$ C14 – C18 | 22.39                          | 0.28            | 0.071        |
| UDSB10    | $\pi$ C27 – C28 | $\pi^*$ C30 – C34 | 24.69                          | 0.27            | 0.073        |
|           | $\pi$ C3 – C4   | $\pi^*$ C5 – C6   | 22.11                          | 0.28            | 0.070        |
| UDSB11    | LP (3) O61      | $\pi^*$ N59 – O60 | 164.28                         | 0.14            | 0.140        |
|           | $\pi$ C41 – C45 | $\pi^*$ N59 – O60 | 28.13                          | 0.15            | 0.062        |
| UDSB12    | LP (3) O61      | $\pi^*$ N60 – O62 | 164.23                         | 0.14            | 0.139        |
|           | $\pi$ C27 – C28 | $\pi^*$ C30 – C34 | 25.00                          | 0.27            | 0.074        |
| UDSB13    | LP (1) N61      | $\pi^*$ C41 – C45 | 28.03                          | 0.33            | 0.091        |
|           | $\pi$ C27 – C28 | $\pi^*$ C30 – C34 | 24.76                          | 0.27            | 0.073        |
| UDSB14    | LP (3) O60      | $\pi^*$ N59 – O61 | 163.70                         | 0.14            | 0.139        |
|           | LP (1) N 62     | $\pi^*$ C41 – C45 | 28.08                          | 0.33            | 0.091        |
